# Supplementary material for: Exonic variants undergoing allele-specific selection in cancers
Source: PubMed Central journal article supplement (PMC8166126; doi:10.1186/s12920-021-00984-1), 2021-05-31
Supplement: 12920_2021_984_MOESM3_ESM.pdf [file 12920_2021_984_MOESM3_ESM.pdf]

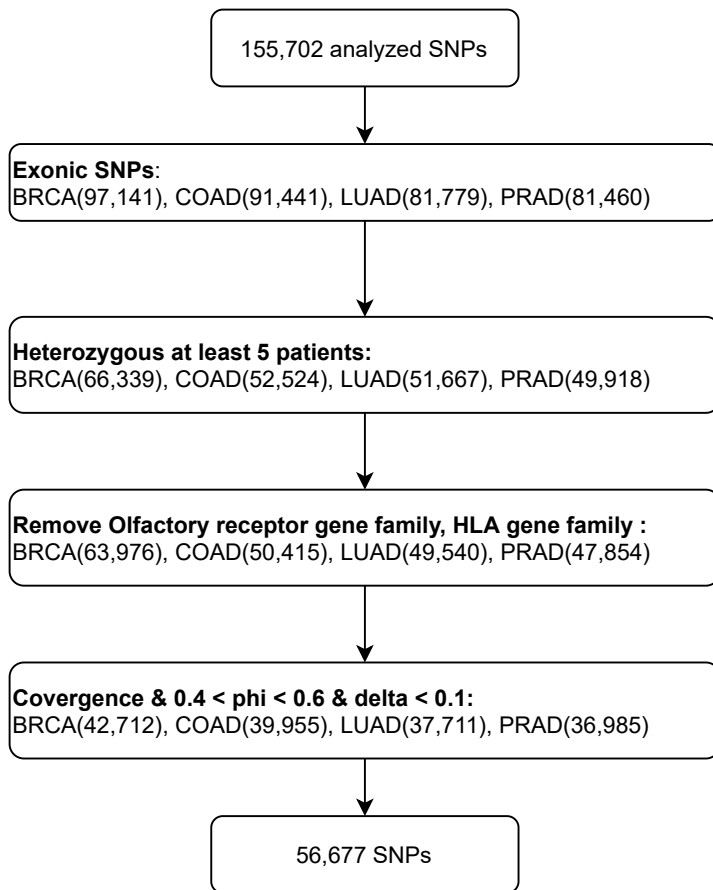

Fig. S1. The inclusion and exclusion filtering of exonic SNPs for allelic imbalance analysis in four cancer types.
