# Supplementary material for: Exonic variants undergoing allele-specific selection in cancers
Source: PubMed Central journal article supplement (PMC8166126; doi:10.1186/s12920-021-00984-1), 2021-05-31
Supplement: 12920_2021_984_MOESM5_ESM.pdf [file 12920_2021_984_MOESM5_ESM.pdf]

A

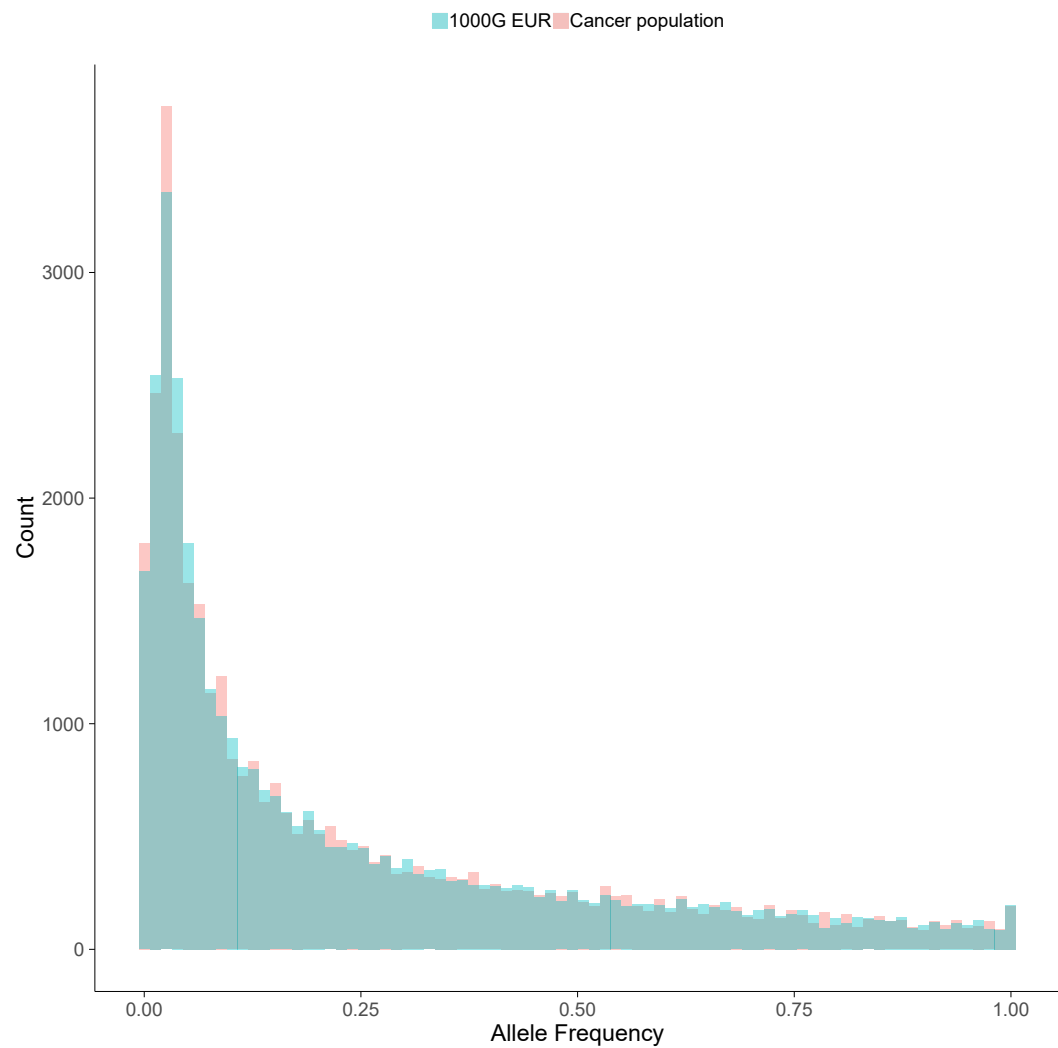

B

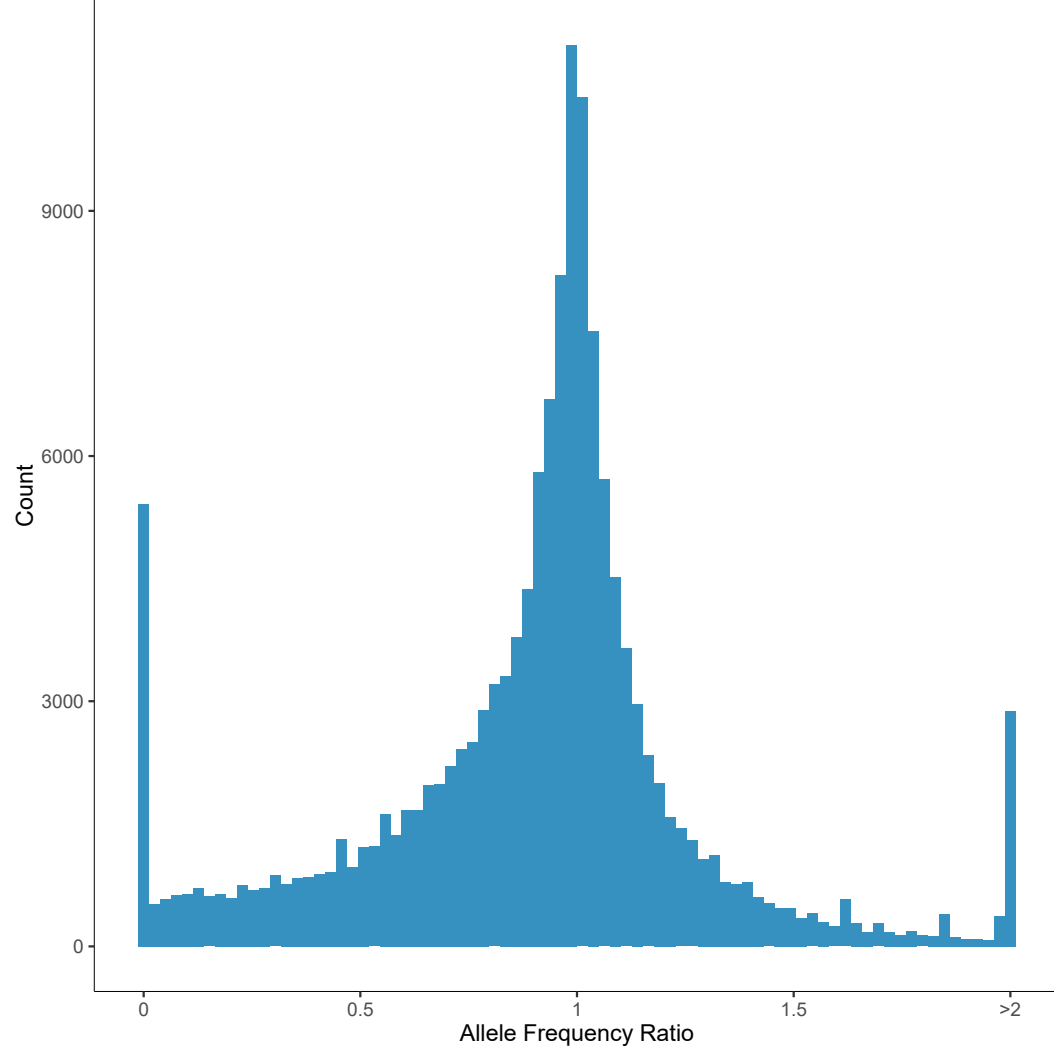

Fig. S2. The distribution of allele frequencies (a) and the ratios of allele frequencies (b) of exonic SNPs in four cancer types.
